# Supplementary material for: Modulating active oxygen species on α-MnO2 with K and Pb for SCR of NO at low temperatures
Source: Royal Society of Chemistry journal article supplement (doi:10.1039/d3cy01068f), 2023-01-01
Supplement: d3cy01068f1.pdf [file d3cy01068f1.pdf]

## Modulating Active Oxygen Species on $\alpha$ -MnO<sub>2</sub> with K and Pb for SCR of NO at Low Temperatures

Gang Yang<sup>a,b</sup>, Xiang Luo<sup>a,b</sup>, Shuai Liu<sup>c</sup>, Chenggong Sun<sup>d</sup>, Tao Wu<sup>a,b,e\*</sup>

a, New Materials Institute, University of Nottingham Ningbo China, Ningbo 315100, China

b, Key Laboratory of Carbonaceous Wastes Processing and Process Intensification of Zhejiang Province, University of Nottingham Ningbo China, Ningbo 315100, China

c, School of Mechatronics and Energy Engineering, NingboTech University, 315100, Ningbo, China

d, Department of Chemical and Environmental Engineering, University of Nottingham, University Park, Nottingham NG7 2RD, UK

e, Nottingham Ningbo China Beacons of Excellence Research and Innovation Institute, 211 Xingguang Road, Ningbo 315048, China

\* Corresponding author: Tao Wu ([Tao.wu@nottingham.edu.cn](mailto:Tao.wu@nottingham.edu.cn))

The calculation equations for the capacity of surface-active oxygen species in Fig. 1 (d)

$$C_{N_2} = 1.5 \int_0^t f(t) \times F \times \frac{1}{V_m} \times \frac{1}{m}$$

$$C_{N_2O} = 2 \int_0^t f(t) \times F \times \frac{1}{V_m} \times \frac{1}{m}$$

$$C_{NO} = 2.5 \int_0^t f(t) \times F \times \frac{1}{V_m} \times \frac{1}{m}$$

Where the  $f(t)$  stands for the product concentration as a function of time;  $V_m$  stands for molar volume of the gas (L/mol);  $m$  stands for the weight of catalysts (g);  $F$  stands for the flow rate of the outlet gas (L).

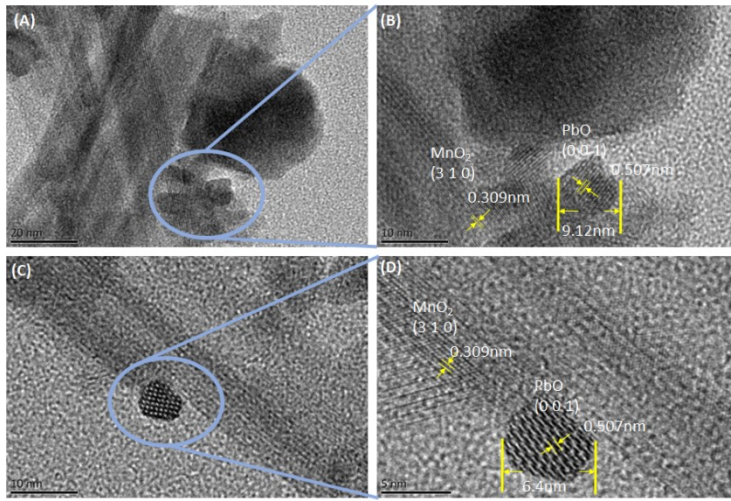

**Figure S1 HRTEM images of Pb-MnO<sub>2</sub>**

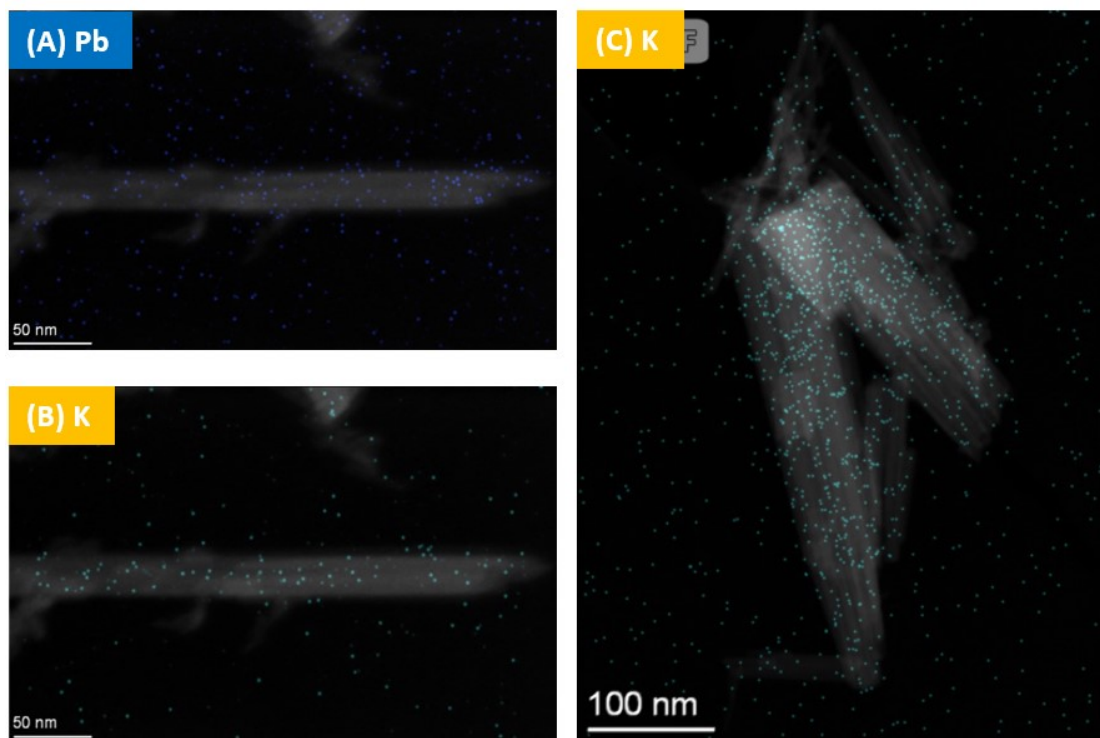

**Figure S2** EDXS mapping of Pb and K on samples: Pb-MnO<sub>2</sub> (a, b); K-MnO<sub>2</sub> (c).

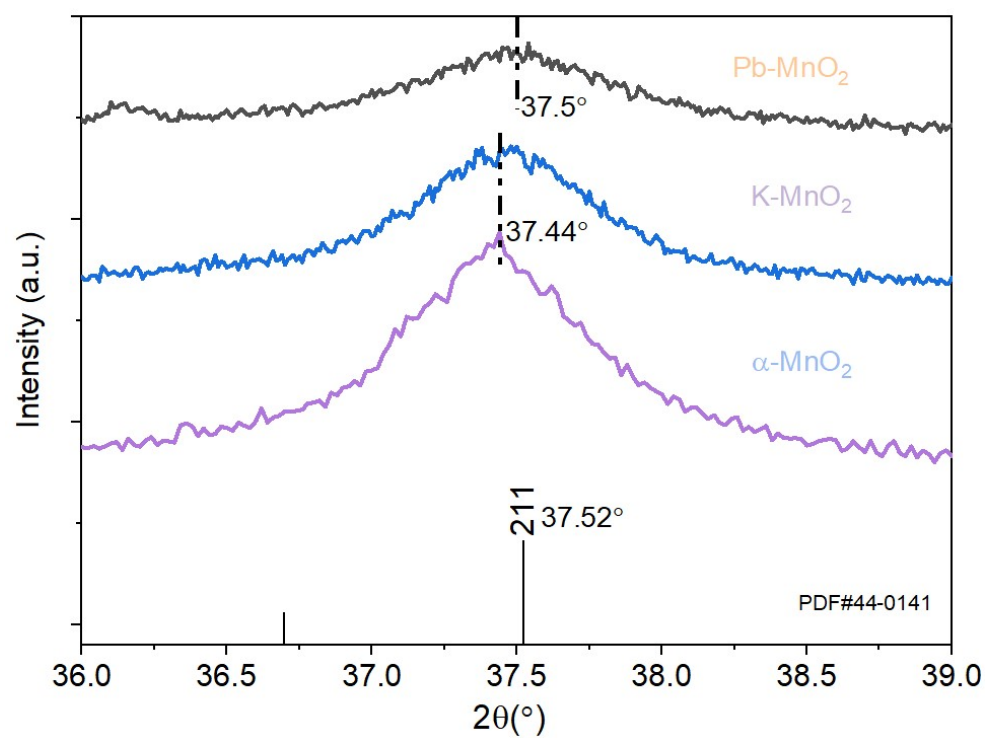

Figure S3 XRD spectra of MnO<sub>2</sub> samples after zooming in of Fig. 4 at the index of (211).

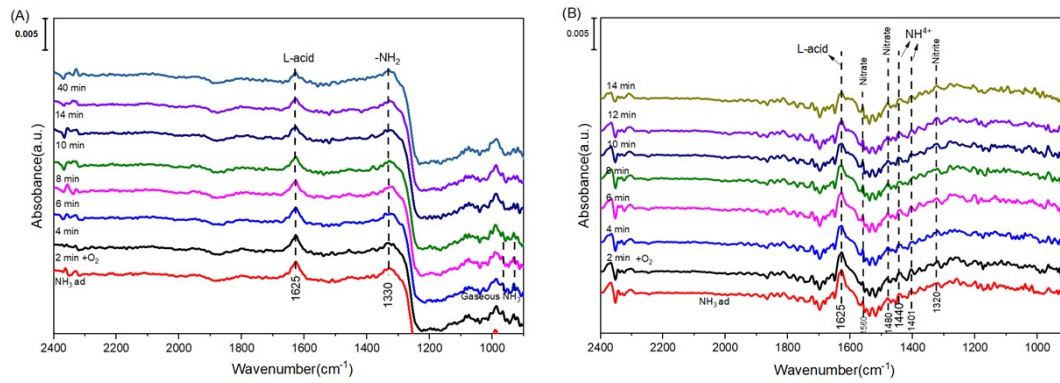

**Figure S4 DRIFT spectra taken at 150 °C upon passing 500 ppm O<sub>2</sub> over the NH<sub>3</sub> pre-adsorbed on samples, (A)K-MnO<sub>2</sub>; (B) Pb-MnO<sub>2</sub>.**

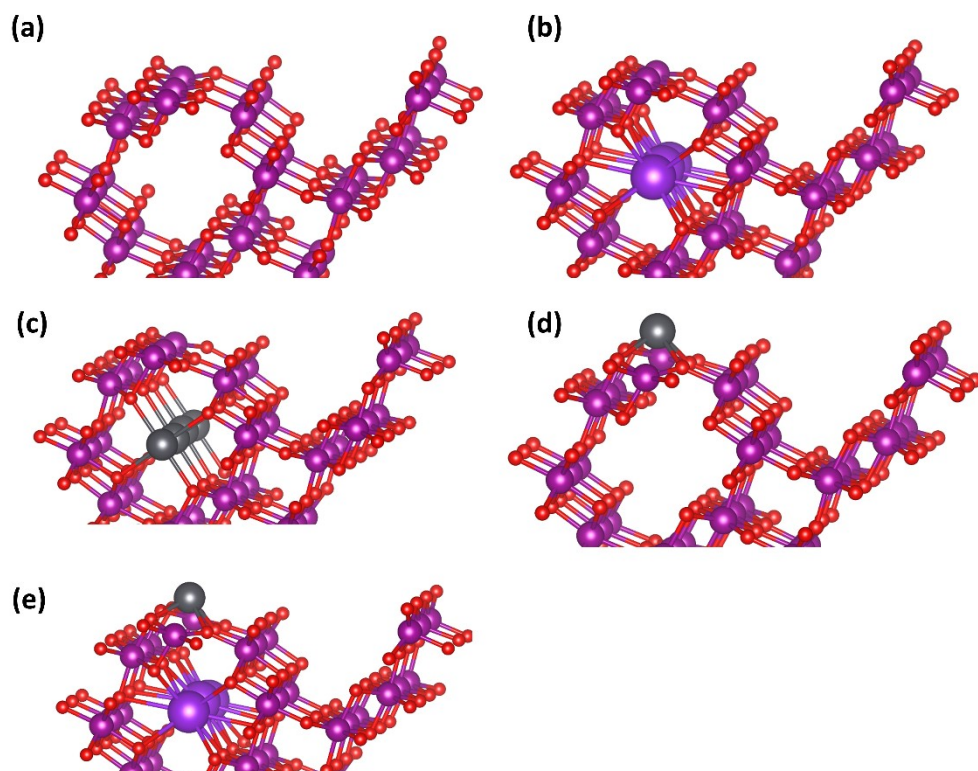

**Figure S5** The side view of the structure model of the K and Pb doped MnO<sub>2</sub>. (a) pure MnO<sub>2</sub>; (b) K atoms were incorporated into the tunnels of MnO<sub>2</sub>; (c) Pb atoms were incorporated into the tunnels of  $\alpha$ -MnO<sub>2</sub>; (d) surface Mn atom was substituted with Pb atom; (e) surface Mn atom was substituted with Pb atom and K atoms were incorporated into the tunnels of MnO<sub>2</sub>.
